# Supplementary material for: Molecular Weight-Dependent Activity of Aminated Poly(α)glutamates as siRNA Nanocarriers
Source: MDPI journal article supplement (doi:10.3390/polym10050548), 2018-05-20
Supplement: s1 [file s1]

# Molecular Weight-Dependent Activity of Aminated Poly( $\alpha$ )glutamates as siRNA Nanocarriers

Adva Krivitsky <sup>1</sup>, Vadim Krivitsky <sup>2</sup>, Dina Polyak <sup>1,3</sup>, Anna Scomparin <sup>1</sup>, Shay Eliyahu <sup>1</sup>, Hadas Gibori <sup>1</sup>, Eilam Yeini <sup>1</sup>, Evgeni Pisarevsky <sup>1</sup>, Rachel Blau <sup>1</sup> and Ronit Satchi-Fainaro <sup>1,\*</sup>

<sup>1</sup> Department of Physiology and Pharmacology, Sackler Faculty of Medicine, Room 607, Tel Aviv University, Tel Aviv 69978, Israel; advashy@gmail.com (A.K.); dina.polyak@gmail.com (D.P.); anna.scomparin@gmail.com (A.S.); s\_eliahu@hotmail.com (S.E.); hadas.gibori@gmail.com (H.G.); eilamyeini@mail.tau.ac.il (E.Y.); Jalchemic@gmail.com (E.P.); rachelniss@gmail.com (R.B.)

<sup>2</sup> School of Chemistry, the Raymond and Beverly Sackler Faculty of Exact Sciences, Tel-Aviv University, Tel Aviv 69978, Israel; vadimkri@gmail.com (V.K.).

<sup>3</sup> Department of Neurosurgery, Stanford University School of Medicine, Stanford, CA 94305, USA (D.P.)

\* Correspondence: ronitsf@post.tau.ac.il; Tel.: +972-3-640-7427

**A**

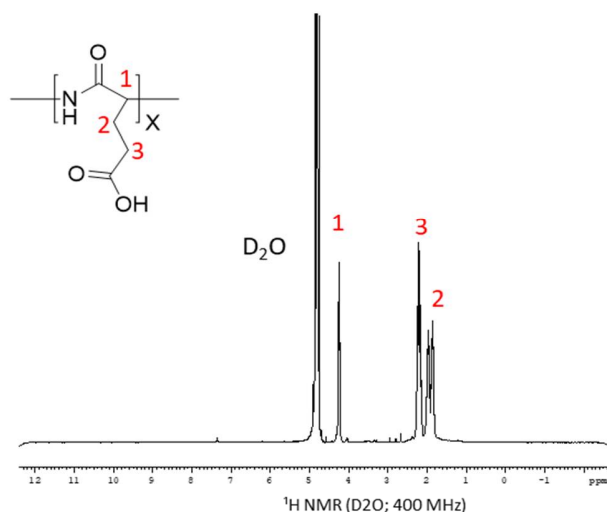

**B**

| Polymer | Mn [g/mol] | PDI   | DP  |
|---------|------------|-------|-----|
| Short   | 11820      | 1.012 | 92  |
| Long    | 21020      | 1.410 | 163 |

**Figure S1: Characterization of the PGA precursor.** (A) <sup>1</sup>H-NMR spectrum obtained at 400 MHz. (B) a table summarizing the Molecular weight ( $M_n$ ), polydispersity index (PDI), and calculated degree of polymerization (DP), as obtained by MALS.

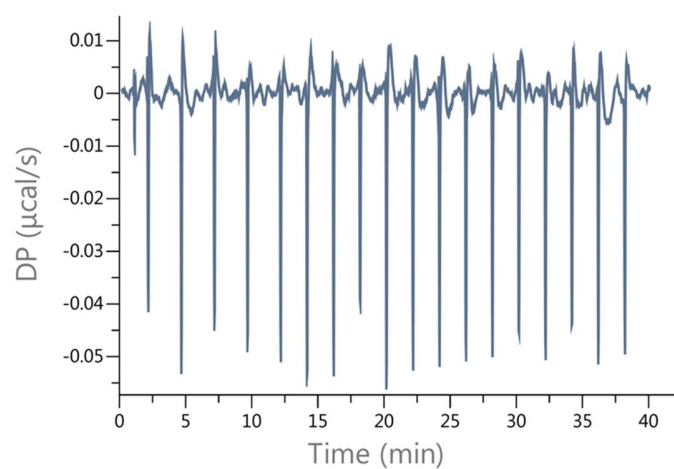

**Figure S2: Isothermal titration calorimetry (ITC) of siRNA titrated into buffer.** The row data obtained from a titration of 20  $\mu\text{M}$  siRNA solution (760  $\mu\text{M}$  Phosphate groups) into 15 mM HEPES.

**A.**

| PGAamine batch | Mn [g/mol] | PDI   | DP | Silencing activity |
|----------------|------------|-------|----|--------------------|
| 1              | 6476       | 1.358 | 23 | Not active         |
| 2              | 7784       | 1.376 | 27 |                    |
| Short          | 7762       | 1.236 | 27 |                    |
| 3              | 9210       | 1.328 | 32 |                    |
| 4              | 9847       | 1.465 | 35 |                    |
| 5              | 11060      | 1.274 | 39 | Active             |
| Long           | 15880      | 1.236 | 56 |                    |
| 6              | 20200      | 1.089 | 71 |                    |

**B.**

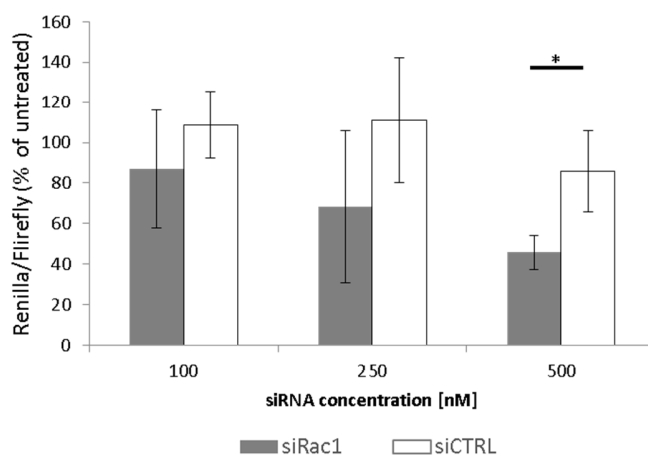

**Figure S3: Various PGAamine synthetic batches.** (A) a table summarizing the molecular weight ( $M_n$ ) and polydispersity index (PDI) of various PGAamine synthetic batches, as analyzed by MALS, their calculated degree of polymerization (DP), versus the silencing activity, as tested by psiCHECK reporter assay. (B) The silencing activity of PGAamine batch #6, as tested by psiCHECK reporter assay. Statistical significance was determined using  $t$ -test, \*  $p < 0.05$

**A.**

| Fraction of “Long” polymer | Mn [g/mol] | PDI   | DP |
|----------------------------|------------|-------|----|
| Shorter                    | 12180      | 1.082 | 43 |
| Longer                     | 15440      | 1.021 | 54 |

**B.**

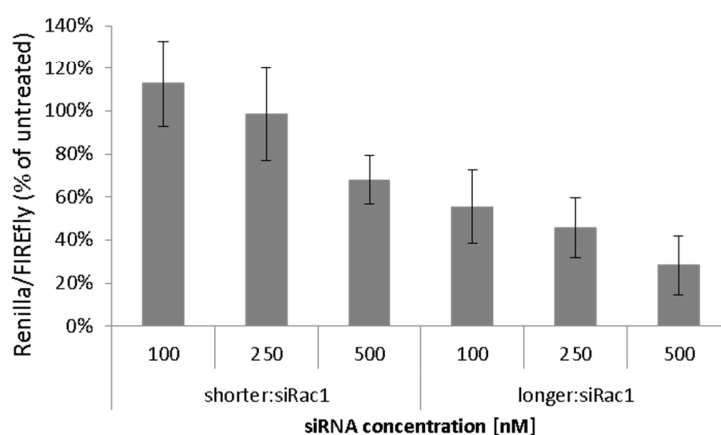

**Figure S4: Separation of Long PGAamine into shorter and longer fractions.** (A) The molecular weight ( $M_n$ ), polydispersity index (PDI), and calculated degree of polymerization (DP) of the two separate fractions of “Long” PGAamine, as analyzed by MALS. (B) Silencing activity of the two separate fractions, as obtained by psiCHECK reporter assay.

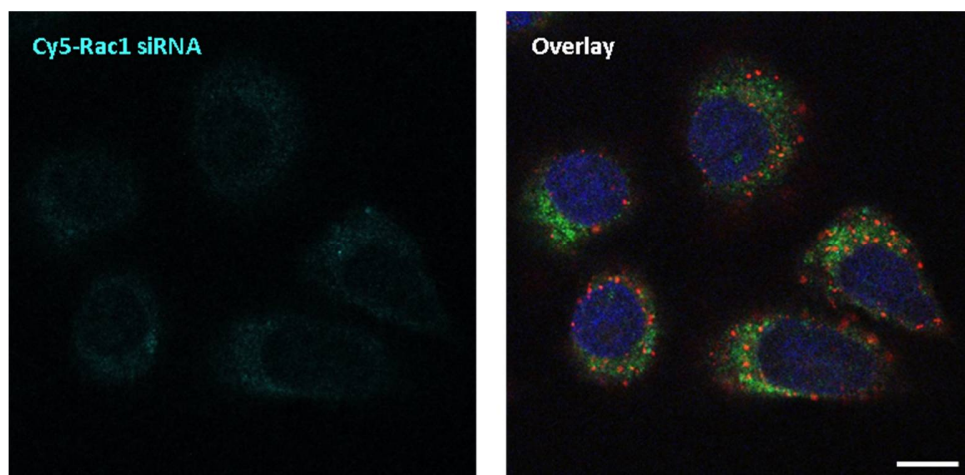

**Figure S5: Cy5-Rac1 siRNA hardly internalized into HeLa cells following 24 h of treatment.** HeLa cells were incubated with Cy5-Rac1 siRNA at a concentration of 100 nM. Scale bar = 10  $\mu$ m. Blue-DAPI (nuclei), Red-EEA1 (endosomes), Green- LAMP1 (lysosomes), Cyan- Rac1-Cy5 siRNA.
